# Supplementary material for: Eco-friendly acetylcholine-carboxylate bio-ionic liquids for controllable N-methylation and N-formylation using ambient CO2 at low temperatures
Source: Royal Society of Chemistry journal article supplement (doi:10.1039/c8gc03549k), 2018-12-20
Supplement: c8gc03549k1.pdf [file c8gc03549k1.pdf]

Electronic supplementary information (ESI)

**Eco-friendly acetylcholine-carboxylate bio-ionic liquids for controllable *N*-methylation and *N*-formylation using ambient CO<sub>2</sub> at low temperatures**

Wenfeng Zhao <sup>a</sup>, Xiaoping Chi <sup>b</sup>, Hu Li <sup>a,\*</sup>, Jian He <sup>a</sup>, Jingxuan Long <sup>a</sup>, Yufei Xu <sup>a</sup>,  
Song Yang <sup>a,\*</sup>

<sup>a</sup> State Key Laboratory Breeding Base of Green Pesticide & Agricultural Bioengineering, Key Laboratory of Green Pesticide & Agricultural Bioengineering, Ministry of Education, State-Local Joint Laboratory for Comprehensive Utilization of Biomass, Center for Research & Development of Fine Chemicals, Guizhou University, Guiyang, Guizhou 550025, China

<sup>b</sup> Beijing National Laboratory of Molecular Science, State Key Laboratory of Molecular Reaction Dynamics, Institute of Chemistry, Chinese Academy of Sciences; University of Chinese Academy of Sciences, Beijing 100049, China

\* Corresponding authors:

E-mails: jhzx.msm@gmail.com (SY); hli13@gzu.edu.cn (HL)

Tel: (+86)851 88292171; Fax: (+86)851 88292170

## **Table of contents:**

**Figure S1** Theoretically calculated/simulated diagram of CC-AA catalyst.

**Figure S2**  $^1\text{H}$  NMR spectra of ionic liquid catalysts: acetylcholine formate (ACH-FA), acetylcholine acetate (ACH-AA), acetylcholine propionate (ACH-PA) and acetylcholine valerate (ACH-VA) with  $\text{d}_6$ -DMSO as deuterated solvent

**Figure S3**  $^{13}\text{C}$  NMR spectra of ionic liquid catalysts: acetylcholine formate (ACH-FA), acetylcholine acetate (ACH-AA), acetylcholine propionate (ACH-PA), and acetylcholine valerate (ACH-VA) with  $\text{d}_6$ -DMSO as deuterated solvent

**Figure S4**  $^1\text{H}$  NMR spectra of ionic liquid catalysts: thyltrimethylammonium (ETA-AA), choline (CH-AA) and chlormequat (CC-AA) acetate with  $\text{d}_6$ -DMSO as deuterated solvent

**Figure S5**  $^{13}\text{C}$  NMR spectra of ionic liquid catalysts: thyltrimethylammonium (ETA-AA), choline (CH-AA) and chlormequat (CC-AA) acetate with  $\text{d}_6$ -DMSO as deuterated solvent

**Table S1** Effect of solvent species on catalytic performance of methylation of *N*-methylaniline using  $\text{CO}_2$

**Figure S6** Images for the reaction mixture treated by adding water after the reaction for isolating the used ACH-AA IL

**Figure S7** Catalyst recycling study. Reaction conditions: 0.25 mmol *N*-methylaniline, 6% mol ACH-AA, 0.75 mmol  $\text{PhSiH}_3$ , 2 mL  $\text{CH}_3\text{CN}$ , 1.0 bar  $\text{CO}_2$ , 50 °C and 6 h. Recycling process: the extracted ionic liquid mixed with water, and activated carbon was added; the resulting slurry was stirred (200 rpm) at room temperature for 24 h, and the activated carbon was subsequently separated by filtration.

**Figure S8** The FT-IR spectra of reused and fresh catalysts

**Figure S9**  $^1\text{H}$  NMR spectra of  $\text{PhSiH}_3$  (A) and its mixture with ACH-AA (B) (Solvent:  $\text{CD}_3\text{CN}$ , 25 °C)

**Figure S10**  $^1\text{H}$  NMR spectra of silyl formate formed from  $\text{PhSiH}_3$ , ACH-AA and 1 bar  $\text{CO}_2$  in  $\text{CD}_3\text{CN}$  under 50 °C for 6 h

**Figure S11**  $^1\text{H}$  NMR spectra of the mixture of *N*-methylaniline and ACH-AA (A), and *N*-methylaniline (B) (Solvent:  $\text{CD}_3\text{CN}$ , 25 °C)

**Figure S12**  $^1\text{H}$  NMR spectra of *N*-methylaniline (A),  $\text{PhSiH}_3$  (B) and their mixture (C) (Solvent:  $\text{CD}_3\text{CN}$ , 25 °C)

**Figure S13**  $^1\text{H}$  NMR spectra of *N*-methylaniline (A), its mixture of  $\text{PhSiH}_3$  under room condition in  $\text{CD}_3\text{CN}$  (B), and standard reaction in the absence of  $\text{CO}_2$  (C).

**Figure S14** Representative GC-MS spectra for producing *N*, *N*-dimethylaniline and *N*-methylformylaniline from *N*-methylaniline using different H-donors under standard reaction conditions: (A) and (B) with  $\text{PhSiH}_3$  in  $\text{CD}_3\text{CN}$ ; (C) and (D) with  $\text{Ph}_2\text{SiD}_2$  in  $\text{CD}_3\text{CN}$ .

**Figure S15** The reaction energy profiles (in kcal/mol) for the hydrosilylation of *N*-methylformanilide with or without CC-AA.

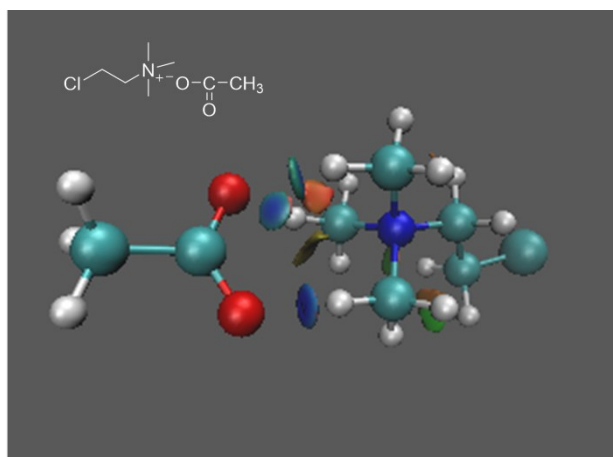

**Figure S1** Calculated/simulated representative atomic diagram of CC-AA catalyst. Fairly strong hydrogen-bond interaction between anion and cation of the bio-IL CC-AA was observed.

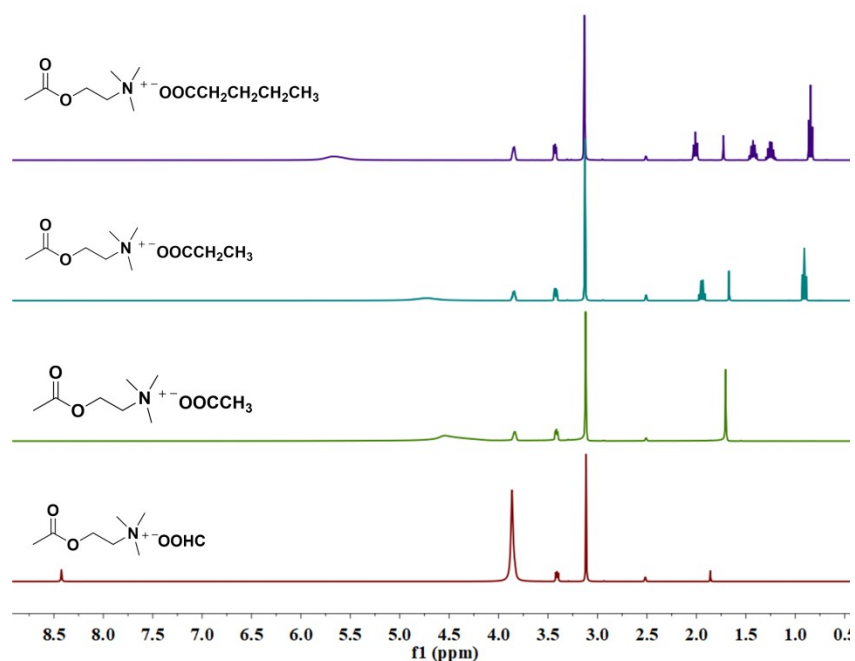

**Figure S2**  $^1\text{H}$  NMR spectra of ionic liquid catalysts: acetylcholine formate (ACH-FA), acetylcholine acetate (ACH-AA), acetylcholine propionate (ACH-PA) and acetylcholine valerate (ACH-VA) with  $\text{d}_6$ -DMSO as deuterated solvent.

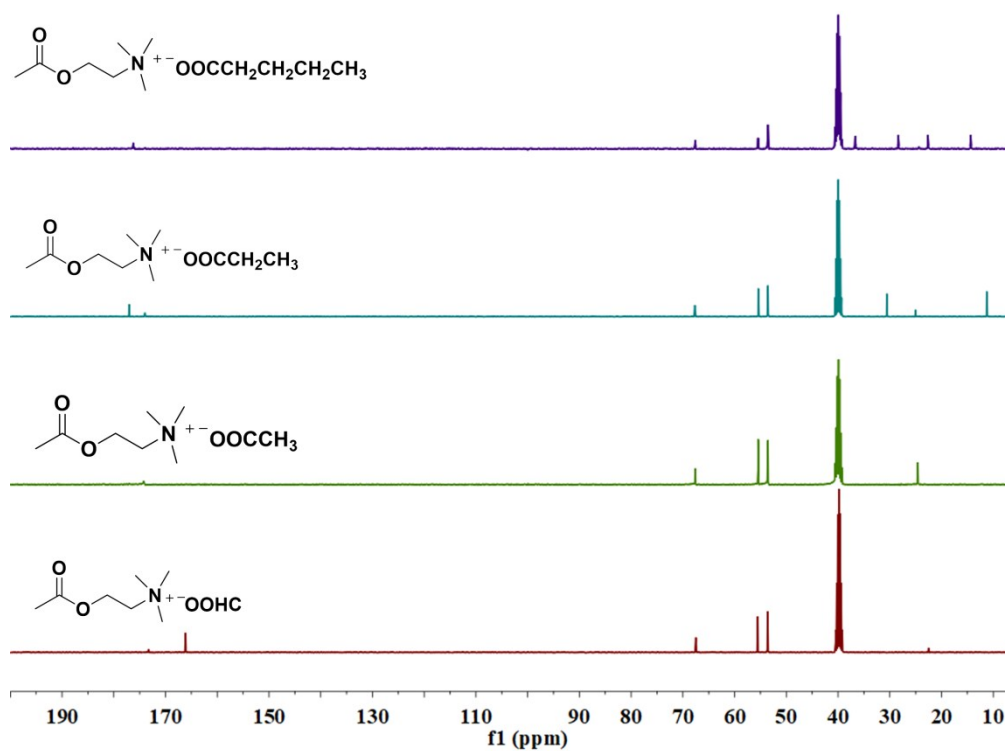

**Figure S3**  $^{13}\text{C}$  NMR spectra of ionic liquid catalysts: acetylcholine formate (ACH-FA), acetylcholine acetate (ACH-AA), acetylcholine propionate (ACH-PA), and acetylcholine valerate (ACH-VA) with  $\text{d}_6$ -DMSO as deuterated solvent

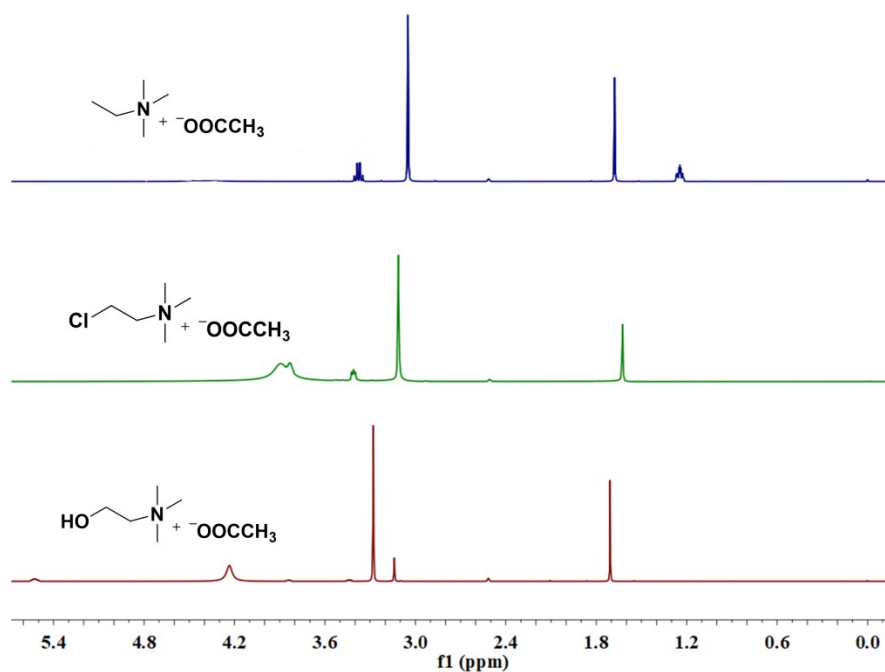

**Figure S4**  $^1\text{H}$  NMR spectra of ionic liquid catalysts: thyltrimethylammonium (ETA-AA), choline (CH-AA) and chlormequat (CC-AA) acetate with  $\text{d}_6$ -DMSO as deuterated solvent

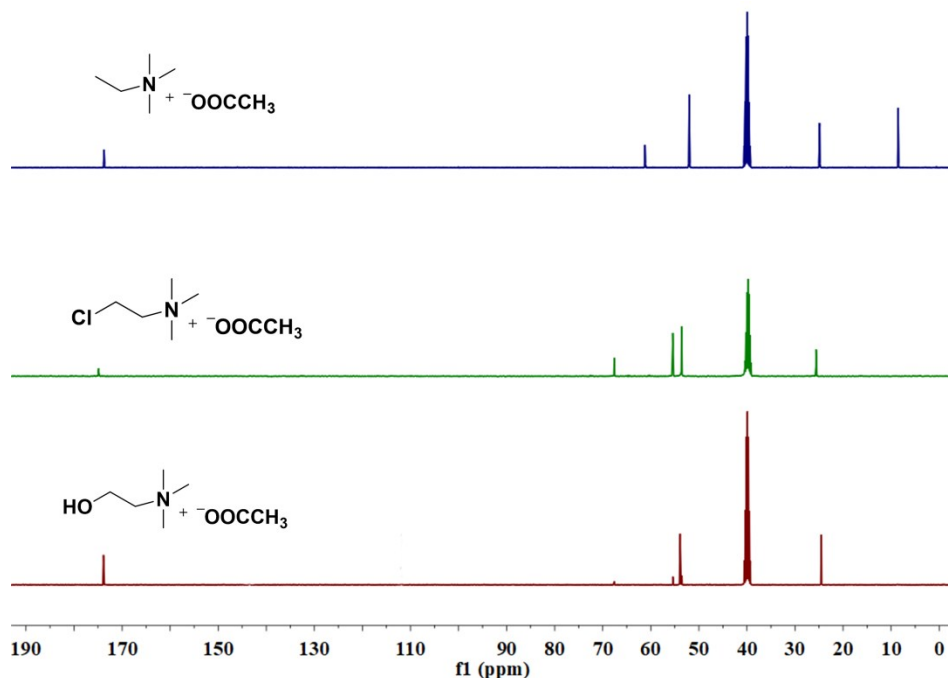

**Figure S5**  $^{13}\text{C}$  NMR spectra of ionic liquid catalysts: thyltrimethylammonium (ETA-AA), choline (CH-AA) and chlormequat (CC-AA) acetate with  $\text{d}_6$ -DMSO as deuterated solvent

**Table S1** Effect of solvent species on catalytic performance of methylation of *N*-methylaniline using CO<sub>2</sub>

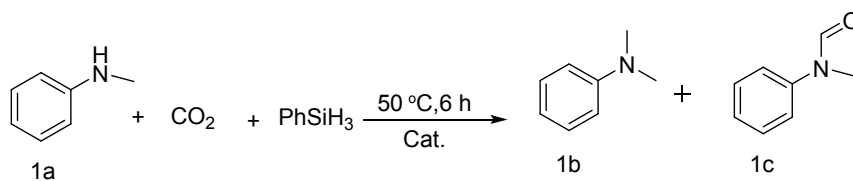

| Entry | Solvent            | Conv. ( <b>1a</b> , %) | Yield ( <b>1b</b> , %) | Yield ( <b>1c</b> , %) |
|-------|--------------------|------------------------|------------------------|------------------------|
| 1     | CH <sub>3</sub> CN | 100                    | 96                     | 2                      |
| 2     | DMF                | 98                     | 86                     | 11                     |
| 3     | EtOH               | 0                      | 0                      | 0                      |
| 4     | EA                 | 53                     | 38                     | 3                      |
| 5     | THF                | 76                     | 65                     | 2                      |
| 6     | <i>n</i> -hexane   | 0                      | 0                      | 0                      |
| 7     | Solvent-free       | 85                     | 24                     | 45                     |

Reaction conditions: 0.25 mmol **1a**, 0.75 mmol PhSiH<sub>3</sub>, 6 mol% ACH-AA, 2.0 mL solvent, 1 bar CO<sub>2</sub>, 50 °C and 6 h. Conversion of **1a**, and yield of **1b** and **1c** were determined by GC using naphthalene as internal standard.

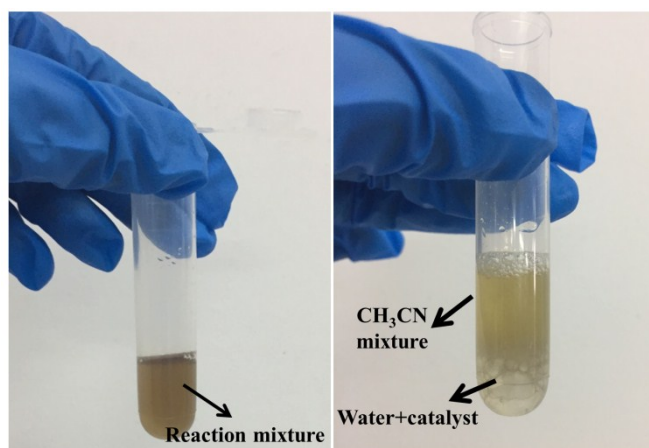

**Figure S6** Images of the reaction mixture treated by adding water and diethyl ether after the reaction for isolating the used ACH-AA IL

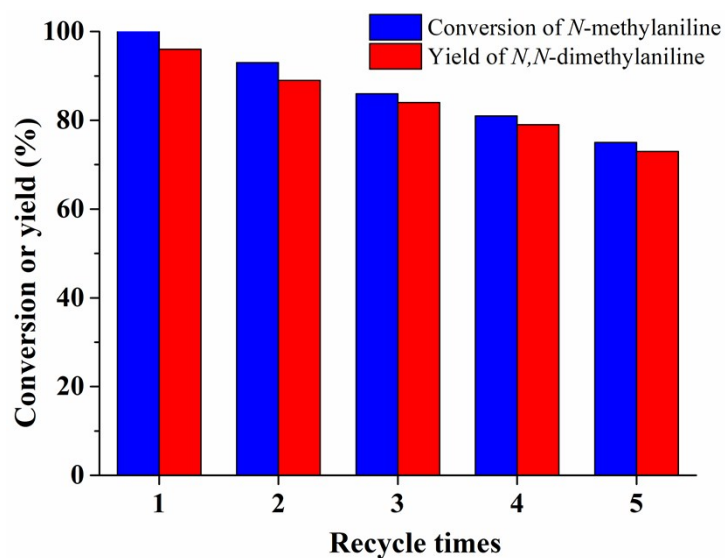

**Figure S7** Catalyst recycling study. Reaction conditions: 0.25 mmol *N*-methylaniline, 6% mol ACH-AA, 0.75 mmol PhSiH<sub>3</sub>, 2 mL CH<sub>3</sub>CN, 1.0 bar CO<sub>2</sub>, 50 °C and 6 h. Recycling process: the extracted ionic liquid mixed with water, and activated carbon was added; the resulting slurry was stirred (200 rpm) at room temperature for 24 h, and the activated carbon was subsequently separated by filtration.

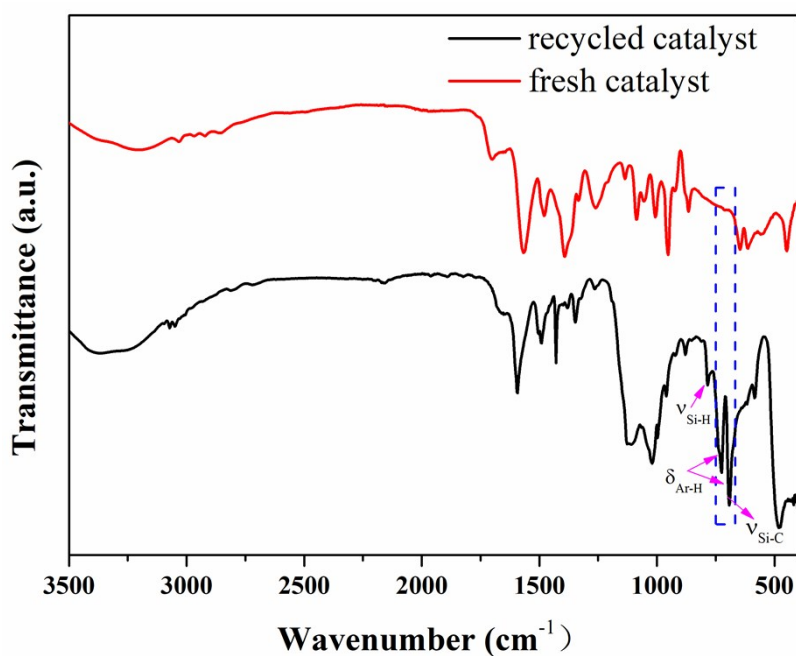

**Figure S8** The FT-IR spectra of reused and fresh ACH-AA catalysts

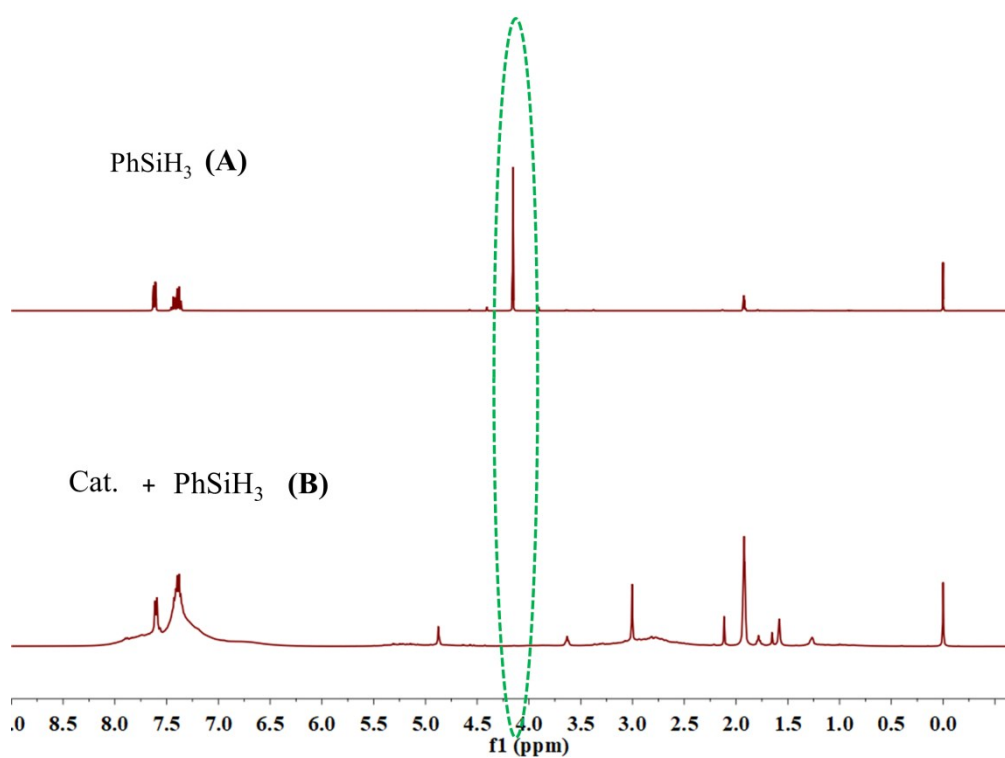

**Figure S9** <sup>1</sup>H NMR spectra of PhSiH<sub>3</sub> (A) and its mixture with ACH-AA (B) (Solvent: CD<sub>3</sub>CN, 25 °C)

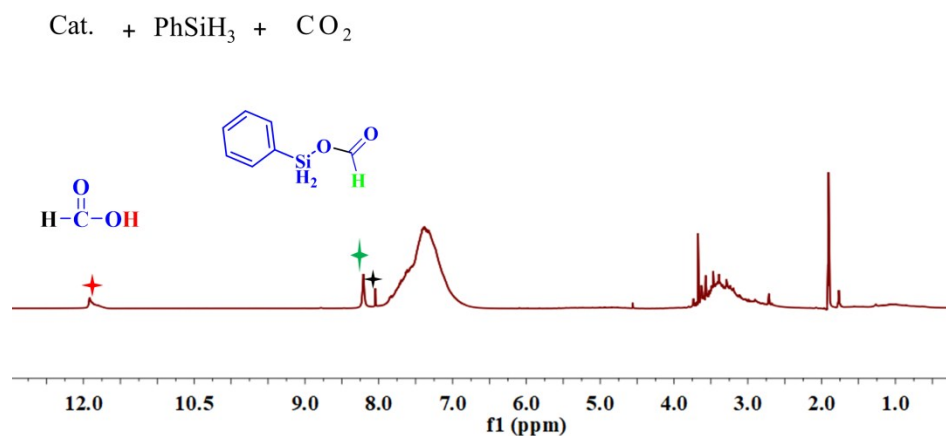

**Figure S10** <sup>1</sup>H NMR spectra of silyl formate formed from PhSiH<sub>3</sub>, ACH-AA and 1 bar CO<sub>2</sub> in CD<sub>3</sub>CN under 50 °C for 6 h



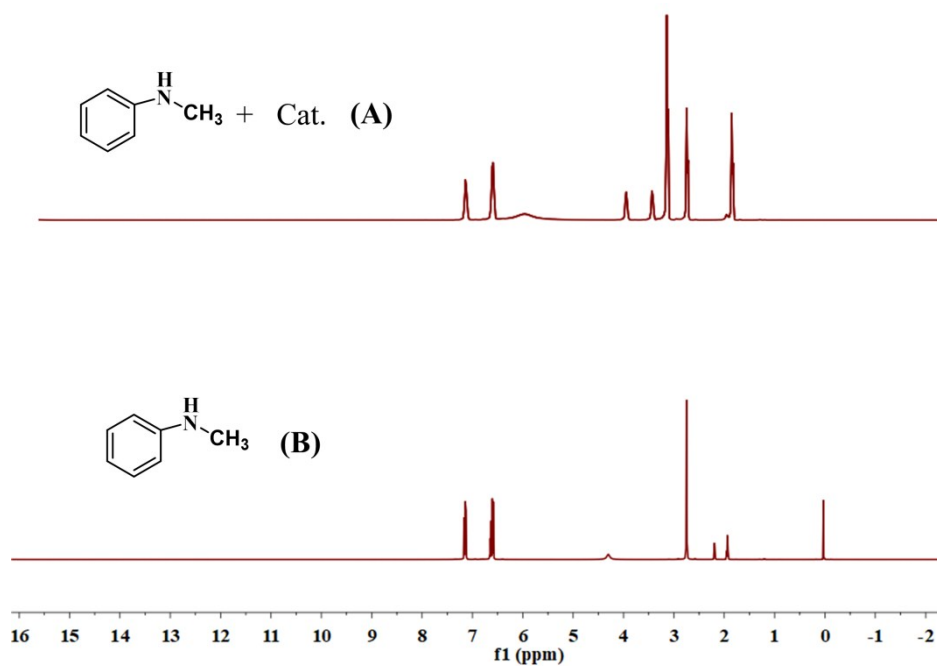

**Figure S11**  $^1\text{H}$  NMR spectra of the mixture of *N*-methylaniline and ACH-AA (A), and *N*-methylaniline (B) (Solvent:  $\text{CD}_3\text{CN}$ , 25  $^\circ\text{C}$ )

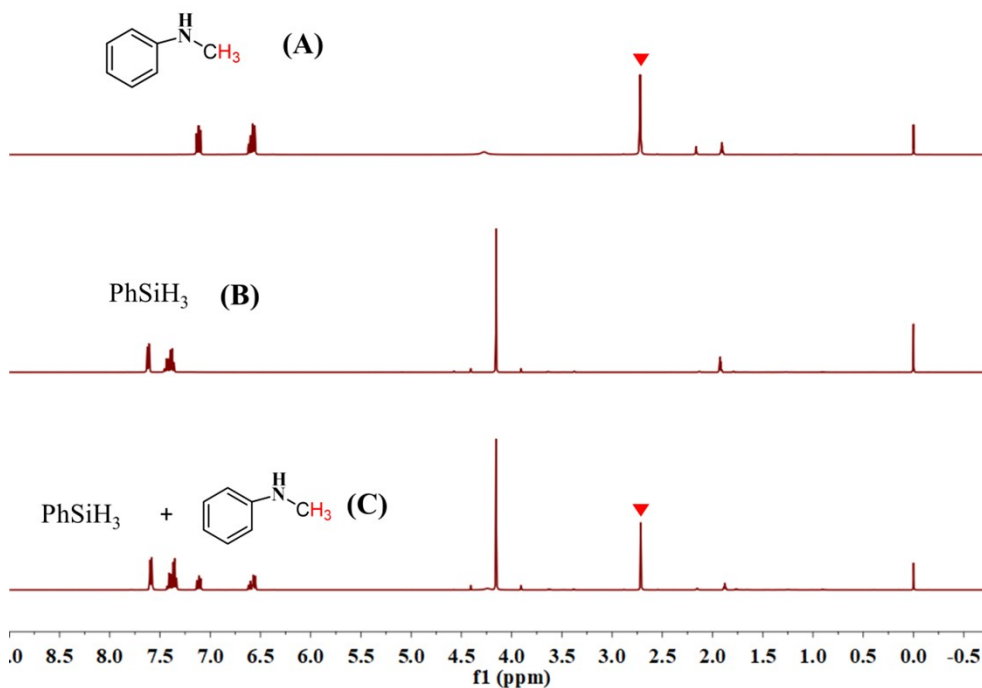

**Figure S12**  $^1\text{H}$  NMR spectra of *N*-methylaniline (A),  $\text{PhSiH}_3$  (B) and their mixture (C) (Solvent:  $\text{CD}_3\text{CN}$ , 25  $^\circ\text{C}$ )

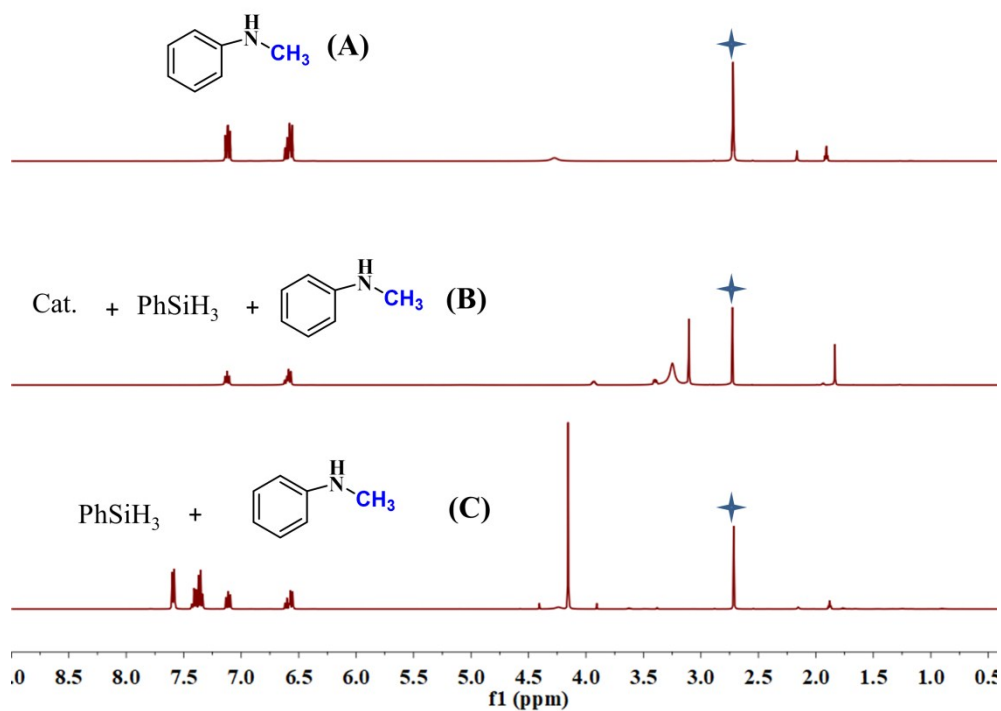

**Figure S13**  $^1\text{H}$  NMR spectra of *N*-methylaniline (A), its mixture of  $\text{PhSiH}_3$  under room condition in  $\text{CD}_3\text{CN}$  (B), and standard reaction in the absence of  $\text{CO}_2$  (C).

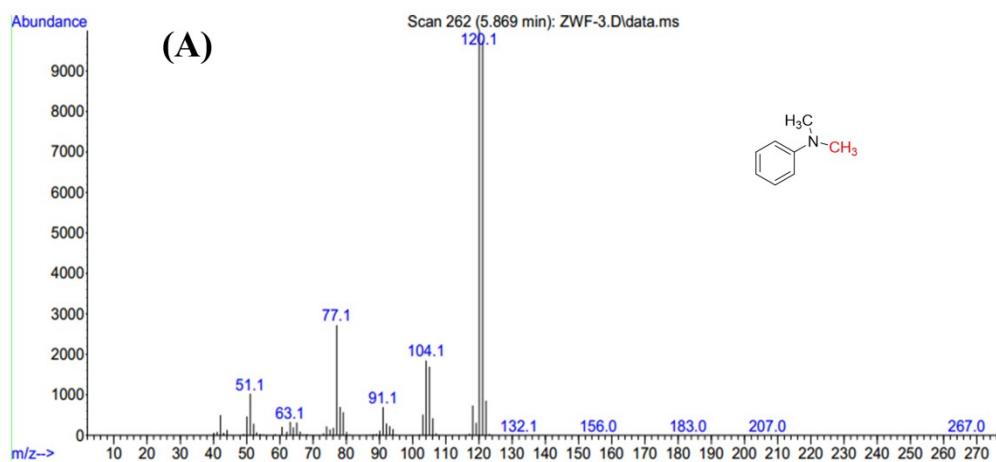

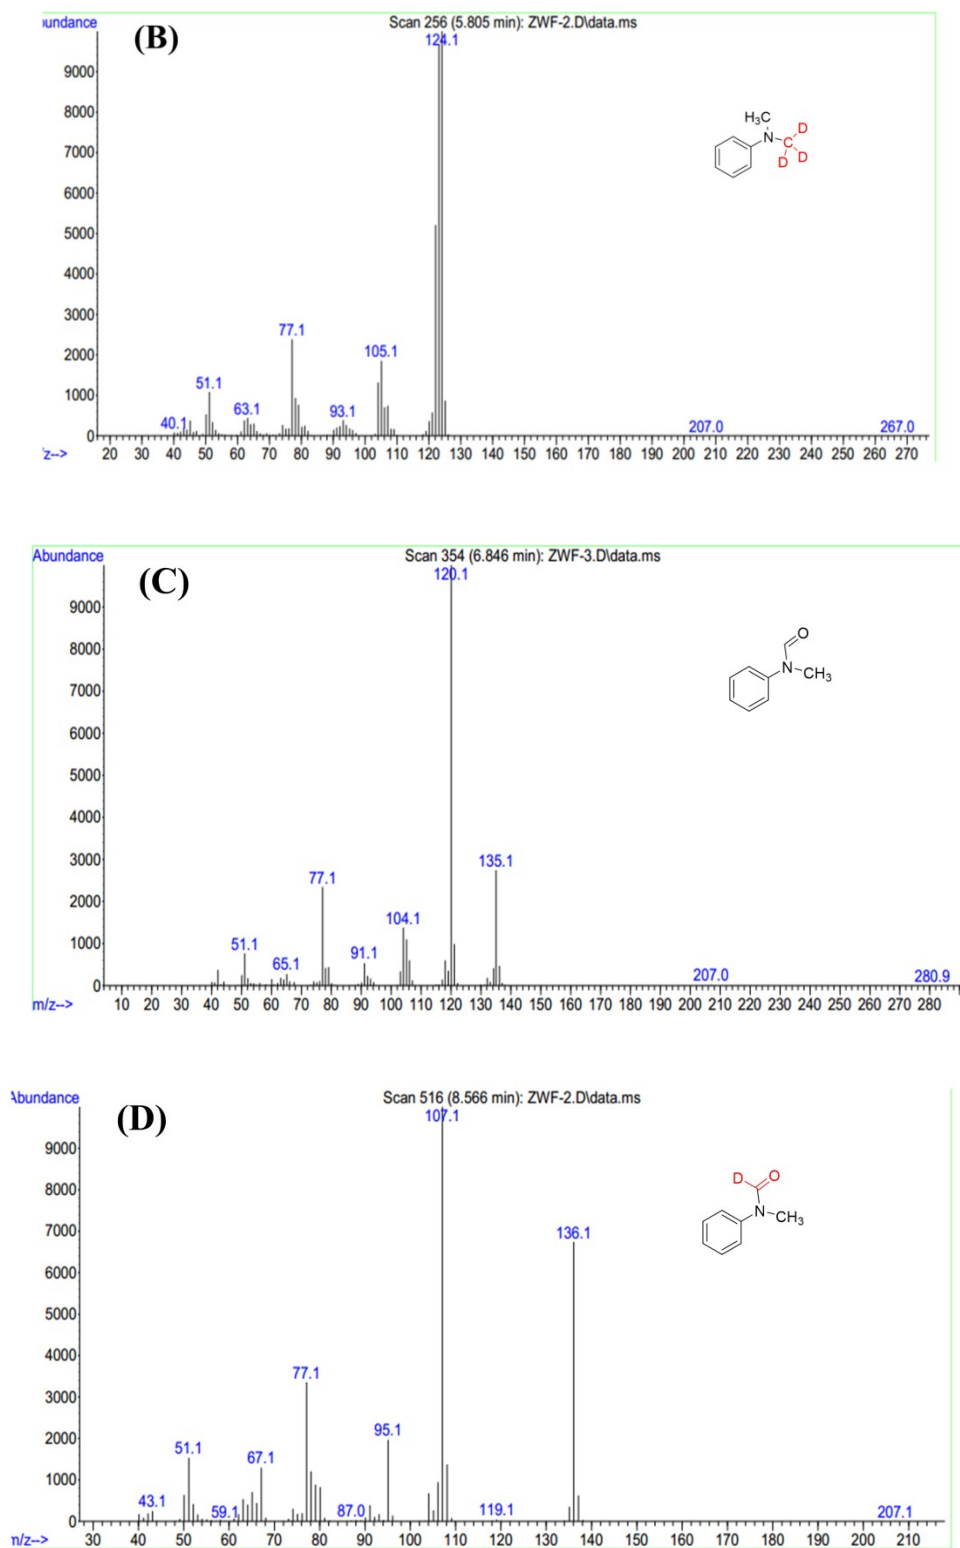

**Figure S14** Representative GC-MS spectra for producing *N,N*-dimethylaniline and *N*-methylformylaniline from *N*-methylaniline using different H-donors under standard reaction conditions: (A) and (B) with  $\text{PhSiH}_3$  in  $\text{CD}_3\text{CN}$ ; (C) and (D) with  $\text{Ph}_2\text{SiD}_2$  in  $\text{CD}_3\text{CN}$ .

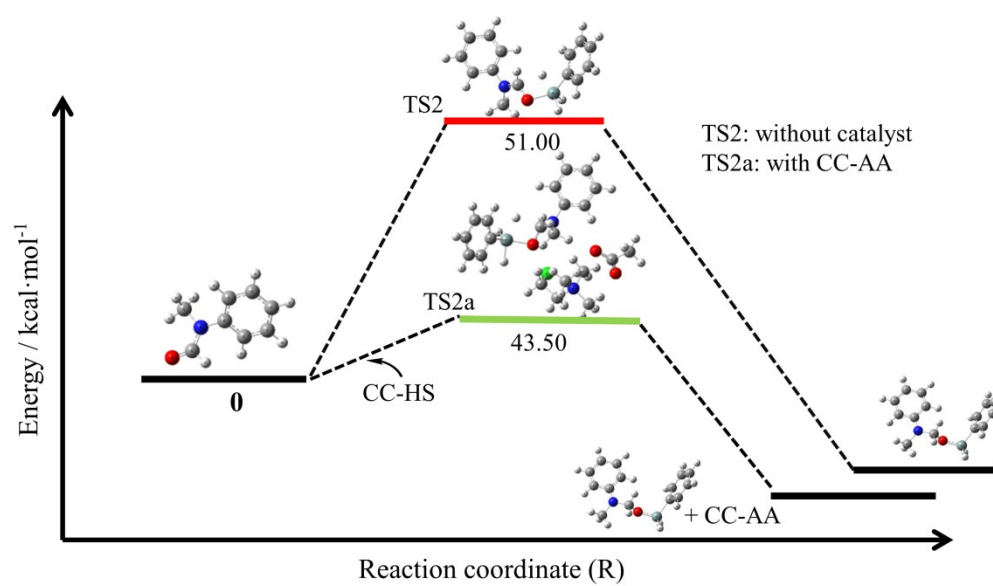

**Figure S15** The reaction energy profiles (in kcal/mol) for the hydrosilylation of *N*-methylformanilide with or without CC-AA.
